# Supplementary material
Source: HighWire-hosted journal article supplement (http://www.qdcxjkg.com/highwire/filestream/113978/field_highwire_adjunct_files/9/ERJ_01240-2013_Worth.pdf)
Supplement: ERJ_01240-2013_Worth.pdf [file ERJ_01240-2013_Worth.pdf]

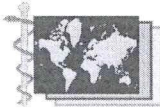

## ICMJE Form for Disclosure of Potential Conflicts of Interest

---

### Section 5. Relationships not covered above

Are there other relationships or activities that readers could perceive to have influenced, or that give the appearance of potentially influencing, what you wrote in the submitted work?

- Yes, the following relationships/conditions/circumstances are present (explain below):
- No other relationships/conditions/circumstances that present a potential conflict of interest

At the time of manuscript acceptance, journals will ask authors to confirm and, if necessary, update their disclosure statements. On occasion, journals may ask authors to disclose further information about reported relationships.

### Section 6. Disclosure Statement

Based on the above disclosures, this form will automatically generate a disclosure statement, which will appear in the box below.

### Evaluation and Feedback

Please visit <http://www.icmje.org/cgi-bin/feedback> to provide feedback on your experience with completing this form.

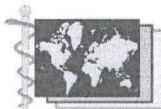

## ICMJE Form for Disclosure of Potential Conflicts of Interest

### Section 1. Identifying Information

1. Given Name (First Name) HEINRICH      2. Surname (Last Name) WORTH      3. Date 18.7.13
4. Are you the corresponding author?     Yes     No
5. Manuscript Title Dual bronchodilation with QVA 149
6. Manuscript Identifying Number (if you know it)

### Section 2. The Work Under Consideration for Publication

Did you or your institution **at any time** receive payment or services from a third party (government, commercial, private foundation, etc.) for any aspect of the submitted work (including but not limited to grants, data monitoring board, study design, manuscript preparation, statistical analysis, etc.)?

Are there any relevant conflicts of interest?     Yes     No

### Section 3. Relevant financial activities outside the submitted work.

Place a check in the appropriate boxes in the table to indicate whether you have financial relationships (regardless of amount of compensation) with entities as described in the instructions. Use one line for each entity; add as many lines as you need by clicking the "Add +" box. You should report relationships that were **present during the 36 months prior to publication.**

Are there any relevant conflicts of interest?     Yes     No

### Section 4. Intellectual Property -- Patents & Copyrights

Do you have any patents, whether planned, pending or issued, broadly relevant to the work?     Yes     No

Heinrich Worth received speaker fees from Almirall, Berlin Chemie, Boehringer-Pfizer, Chiesi, Glaxo Smith Kline, Klosterfrau, Mundipharma, Takeda and Novartis and consulting fees from Almirall, Berlin Chemie, Bionorica, Novartis and Takeda/Nycomed. Prof. Heinrich Worth received grant support from Boehringer-Pfizer, Astra Zeneca, Klosterfrau and Takeda/Nycomed and has never received grant support from the Tobacco industry. Prof. Heinrich Worth has no stock holdings in any of these companies.
